# Supplementary material for: Cobalt-doped graphitic carbon nitride with enhanced peroxidase-like activity for wastewater treatment
Source: Royal Society of Chemistry journal article supplement (doi:10.1039/c6ra02911f), 2016-01-01
Supplement: c6ra02911f1.pdf [file c6ra02911f1.pdf]

## Supporting information

### Cobalt-doped graphitic carbon nitride with enhanced peroxidase-like activity for wastewater treatment

Jianshuai Mu,<sup>a</sup> Jie Li,<sup>a</sup> Xin Zhao,<sup>a</sup> En-Cui Yang<sup>\*a</sup> and Xiao-Jun Zhao<sup>\*a, b</sup>

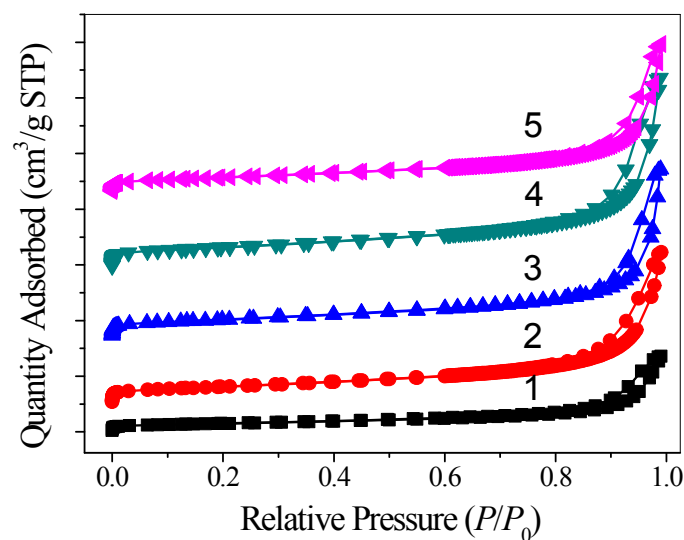

**Fig. S1** N<sub>2</sub> adsorption–desorption isothermal curves of g-C<sub>3</sub>N<sub>4</sub> and Co-g-C<sub>3</sub>N<sub>4</sub> materials. 1, g-C<sub>3</sub>N<sub>4</sub>; 2, Co-g-C<sub>3</sub>N<sub>4</sub>-1; 3, Co-g-C<sub>3</sub>N<sub>4</sub>-2; 4, Co-g-C<sub>3</sub>N<sub>4</sub>-3; 5, Co-g-C<sub>3</sub>N<sub>4</sub>-4.

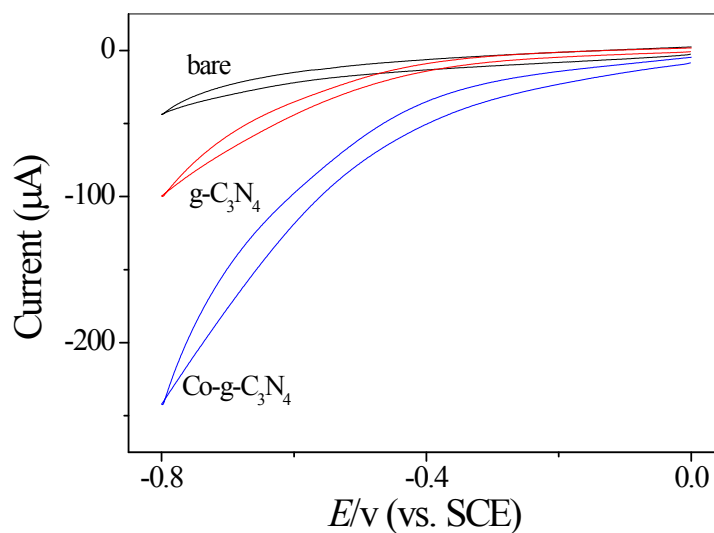

**Fig. S2** Cyclic voltammograms of the bare electrode, g-C<sub>3</sub>N<sub>4</sub> and Co-g-C<sub>3</sub>N<sub>4</sub>-2 modified electrode. Conditions: 20 mM H<sub>2</sub>O<sub>2</sub> in 100 mM phosphate-citric buffer (pH 4.5).

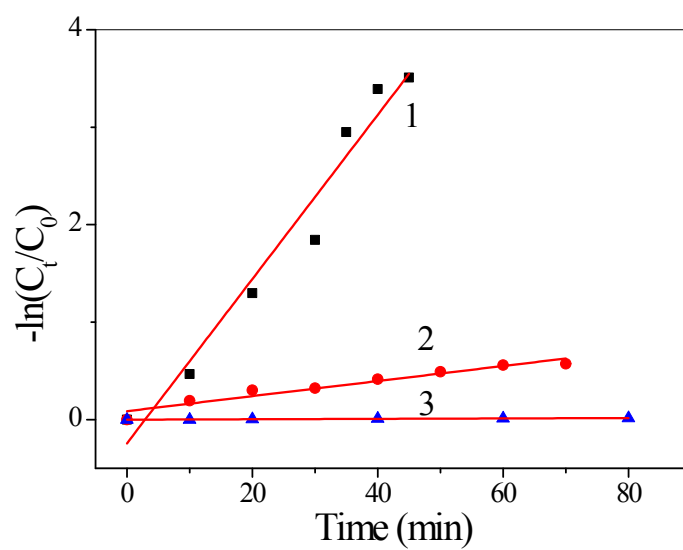

**Fig. S3** Plots of  $\ln(C_t/C_0)$  versus time of rhodamine B degradation under different conditions. 1, Co-g- $C_3N_4+H_2O_2$ ; 2, g- $C_3N_4+ H_2O_2$ ; 3,  $H_2O_2$ .
